# Supplementary material for: Magnetic purification of non-precious metal fuel cell catalysts for obtaining atomically dispersed Fe centers
Source: Royal Society of Chemistry journal article supplement (doi:10.1039/c9cy02304f), 2019-12-16
Supplement: c9cy02304f1.pdf [file c9cy02304f1.pdf]

Electronic Supplemental Information

## **Magnetic purification of non-precious metal fuel cell catalysts for obtaining atomically dispersed Fe centers**

Yuta Nabae,<sup>\*a</sup> Shinsuke Nagata<sup>a</sup>, Keizo Kusaba<sup>a</sup>, Tsutomu Aoki<sup>a</sup>, Teruaki Hayakawa<sup>a</sup>, Hajime Tanida<sup>b</sup>, Hideto Imai<sup>b</sup>,  
Katsuaki Hori<sup>c</sup>, Yuta Yamamoto<sup>d</sup>, Shigeo Arai<sup>d</sup> and Junya Ohyama<sup>e</sup>

<sup>a</sup> Department of Materials Science and Engineering, Tokyo Institute of Technology, 2-12-1 S8-26, Ookayama, Meguro-ku, Tokyo 152-8552, Japan. E-mail: nabae.y.aa@m.titech.ac.jp

<sup>b</sup> Device Analysis Department, NISSAN ARC, LTD., 1 Natsushima-cho, Yokosuka, Kanagawa 237-0061, Japan.

<sup>c</sup> Ookayama Materials Analysis Division, Technical Department, Tokyo Institute of Technology, 2-12-1 S7-26, Ookayama, Meguro-ku, Tokyo 152-8552, Japan.

<sup>d</sup> eInstitute of Materials and Systems for Sustainability, Nagoya University, Furo-cho, Chikusa-ku, Nagoya, 464-8603, Japan.

<sup>e</sup> Faculty of Advanced Science and Technology, Kumamoto University, 2-39-1 Kurokami, Chuo-ku, Kumamoto, 860-8555, Japan.

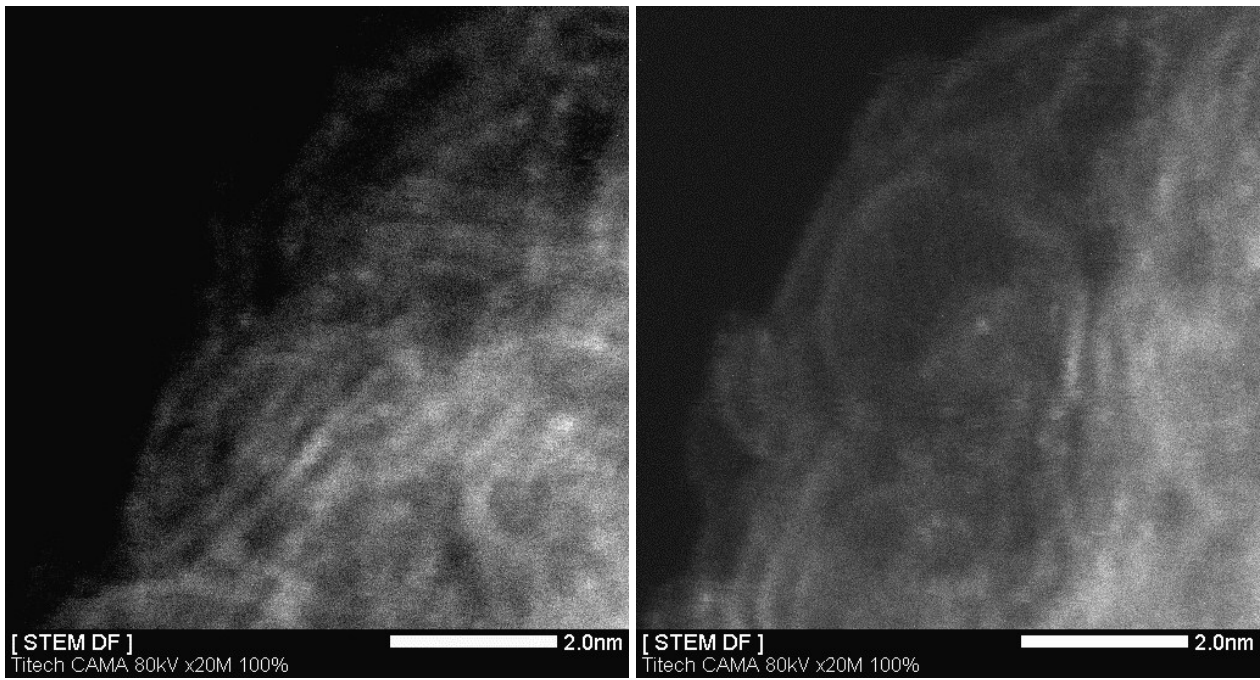

Figure S1. STEM dark field image of Fe(0.3)/PI\_P obtained with JEOL-R005.

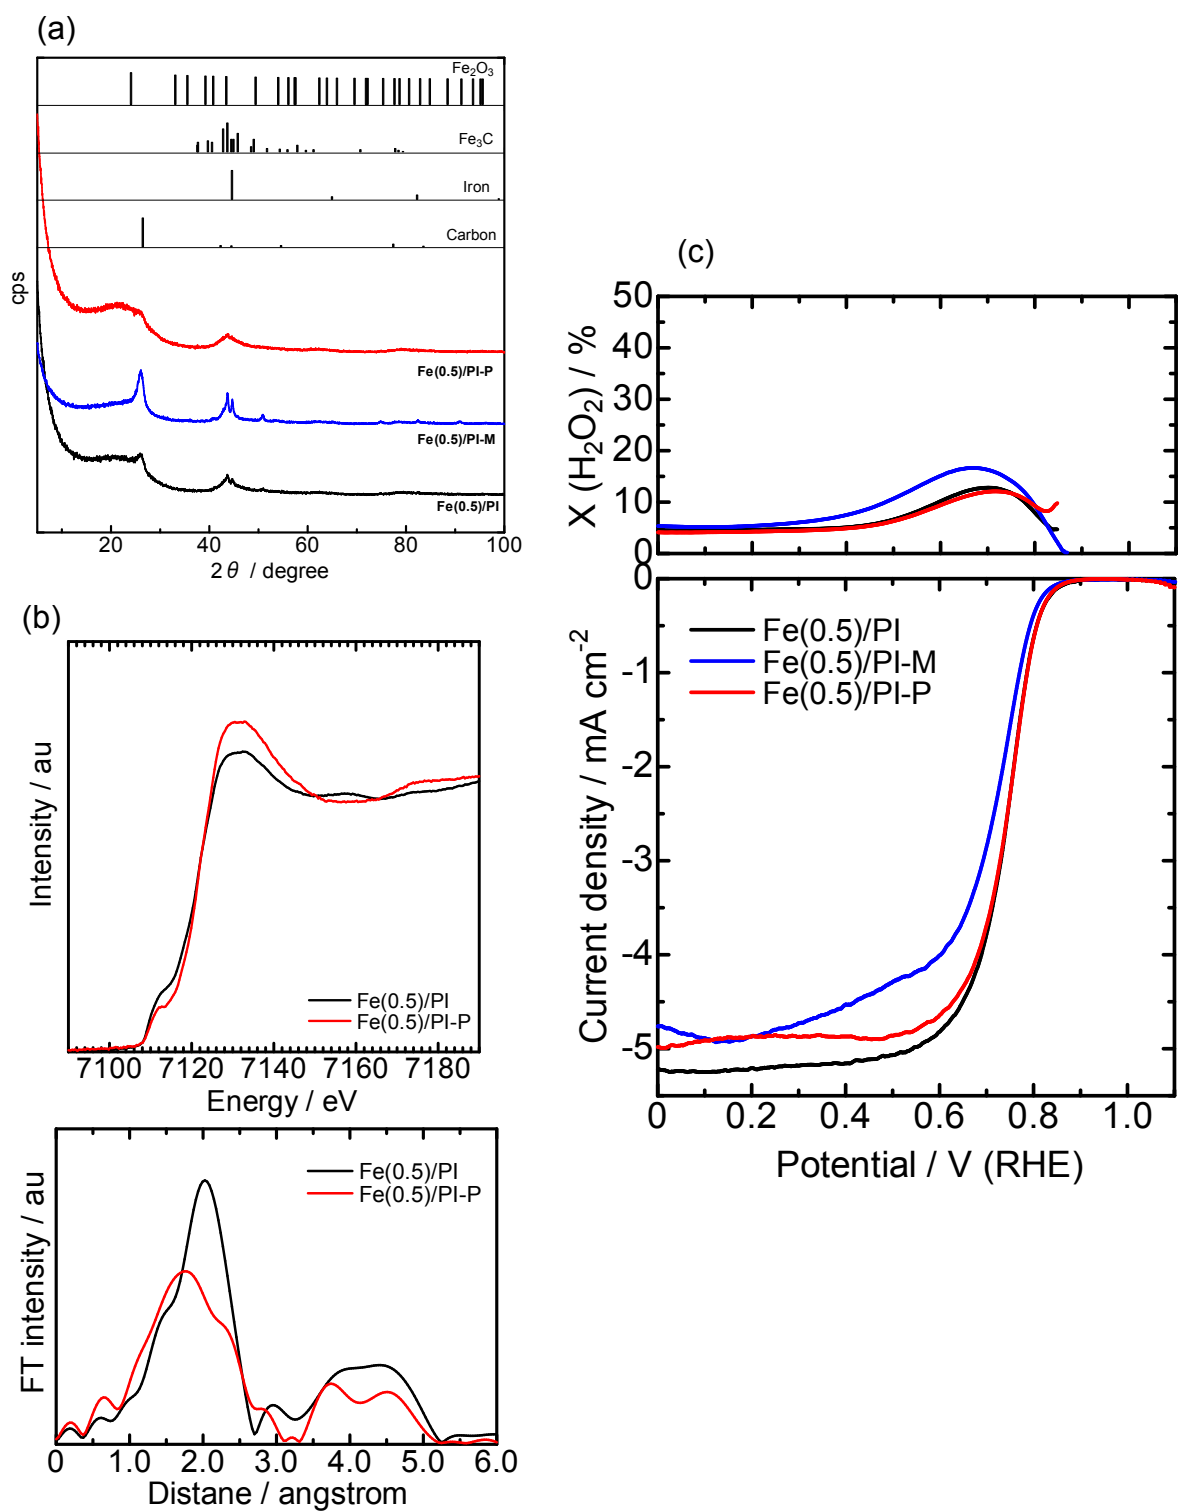

Figure S2. Results of (a) XRD, (b) X-ray absorption and (c) half-cell testing for Fe(0.5)/PI and Fe(0.5)/PI\_P.
